# Supplementary material
Source: PubMed Central journal article supplement (PMC7225065)
Supplement: NIHMS1064391-supplement-4.pdf [file NIHMS1064391-supplement-4.pdf]

614 **SUPPLEMENTAL FIGURES**

615

616 **Lagrange strain field during impact**

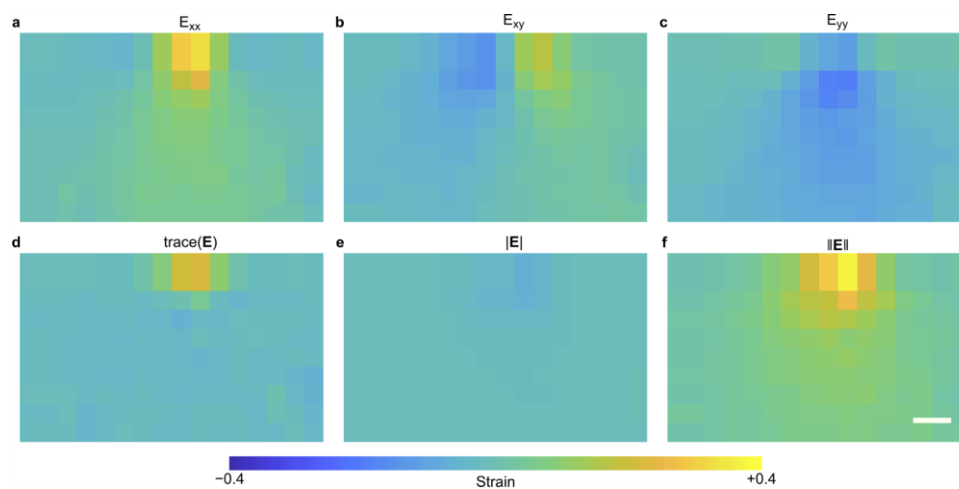

**Fig S1. Average components and scalar measures of the Lagrange strain during impact.**

Strain fields are shown for the various strain measures tested, including: (a)  $E_{xx}$ , the axial strain in the lateral direction, (b)  $E_{xy}$ , the shear strain, (c)  $E_{yy}$ , the axial strain in the depth direction (parallel to the impact), (d) the trace of the strain tensor (first invariant), (e) the determinant of the strain tensor (second invariant), and (f) the spectral norm of the strain tensor. These strain measures were derived from the average 2D Lagrange strain tensor in each spatial bin at peak indentation during impact. Scale bar indicates 200  $\mu\text{m}$ .

617 **Correlations between cellular dysfunction and strain over time**

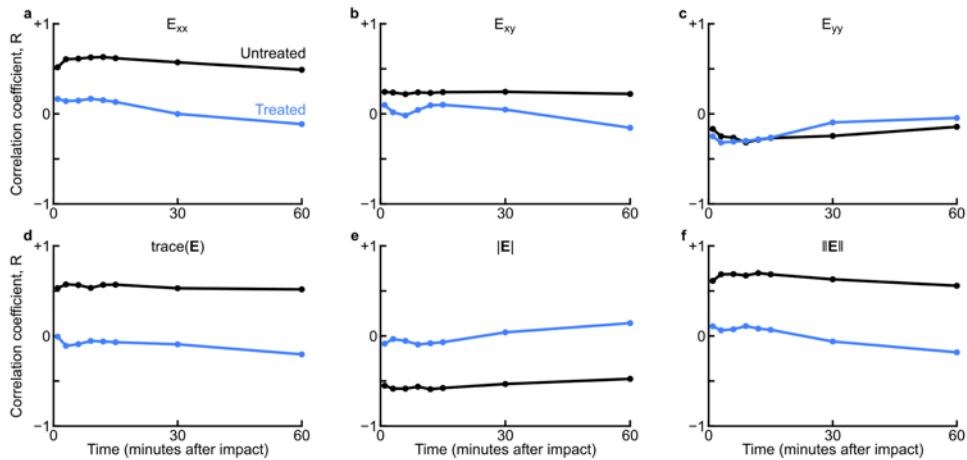

**Fig S2. Correlations between fractional depolarization and strain are much weaker after treatment but are consistent over time.** Each plot shows the correlation coefficient between the average fraction of depolarized cells in each spatial bin over time and a corresponding strain measure, including: (a)  $E_{xx}$ , the axial strain in the lateral direction, (b)  $E_{xy}$ , the shear strain, (c)  $E_{yy}$ , the axial strain in the depth direction (parallel to the impact), (d) the trace of the strain tensor (first invariant), (e) the determinant of the strain tensor (second invariant), and (f) the spectral norm of the strain tensor. These strain measures were derived from the average 2D Lagrange strain tensor in each spatial bin at peak indentation during impact and were correlated with the average fraction of depolarized cells in that same spatial bin. In general, the correlation is consistent over time and treatment reduces the correlation (R closer to zero). Additionally, the correlation is strongest for the strain norm, which represents the overall magnitude of strain at a given location.

618 **Validation of experimental method and mitochondrial polarity assay**

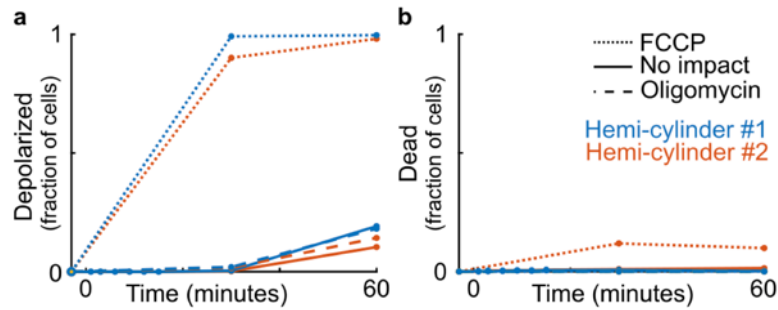

**Fig S3. Validation of experimental method and mitochondrial polarity assay.**

(a) Repeating the experimental method with no treatment and no impact on either hemi-cylinder showed low, but non-zero mitochondrial dysfunction over time, reflecting systematic effects inherent to the method (solid lines). The mitochondrial polarity imaging assay was validated by repeating the experiment (no impact and no treatment) with the addition of either FCCP (dotted lines) or oligomycin (dashed lines) at time zero. (a) As expected, nearly all observed chondrocytes showed depolarization when exposed to FCCP, while chondrocytes exposed to oligomycin retained full mitochondria polarity, paralleling the results in for the no-impact group. (b) In all cases, there was negligible cell death, as expected. The three treatments (no impact, FCCP, and oligomycin) reflect results from three explants taken from three separate animals. For each treatment (i.e. for each animal), lines are shown for both the first and second halves of the associated cylindrical explant, in blue and orange, respectively.

619 **SUPPLEMENTAL METHODS**

620

621 **Data availability**

622 The data and associated analysis code that support the findings of this study are available in  
623 figshare: [doi.org/10.6084/m9.figshare.6349205.v1](https://doi.org/10.6084/m9.figshare.6349205.v1).

624

625 **Image Analysis of Cellular Function**

626 Confocal images at all locations and time points were analyzed to extract individual-cell  
627 behavior over time. This analysis included three steps: registration, segmentation, and  
628 classification, all of which were performed using MATLAB (The MathWorks, Waltham, MA).  
629 Density estimates were then used to compute local variations in the fraction of cells in each state.

630 *Registration.* Confocal images at each imaging location were registered over time to correct  
631 for drift in the microscope stage. Intensity-based registration was performed between adjacent  
632 time points, allowing for rigid-body translation only. All images were then transformed back to  
633 the first time point's frame of reference and regions in the newly-transformed space that no  
634 longer had complete time information were discarded (i.e. regions of the sample that move out of  
635 the field of view).

636 *Segmentation.* Images at the first time point were segmented to locate individual cells.  
637 Segmentation was performed using a previously-described algorithm based on the watershed  
638 transform [74], using parameters that were chosen to match the manually-counted cell density in  
639 a test image: equalization clip limit: 0.01; background size: 23 px; median size: 7 px; Gaussian  
640 radius: 9 px; minimum area: 300 px<sup>2</sup>; maximum area: 5000 px<sup>2</sup>; minimum signal: 0.1, i.e. 10% of

641 full range. The resulting segmentation defines regions (i.e. cells) at the first time point. These  
642 same regions were also valid at all subsequent time points, since images had been transformed  
643 back to the first time point and chondrocytes are not mobile in their native tissue environment.

644 *Classification.* Each identified cell was analyzed at each time point to classify it into one of  
645 three possible states: alive with polarized (i.e. functional) mitochondria, alive with depolarized  
646 mitochondria, and dead. For classification, scalar features were calculated for each cell at each  
647 time point and these features were then thresholded. Given the distribution of pixel intensities  
648 inside each cell region at a given time point, the following features were calculated: the 96<sup>th</sup>  
649 percentile of blue pixel values ( $B_t^{(96)}$ ), the 88<sup>th</sup> percentile of red pixel values ( $R_t^{(88)}$ ), and the  
650 relative change in the 90<sup>th</sup> percentile of the red pixel values ( $\bar{R}_t^{(90)} = (R_t^{(90)} - R_0^{(90)})/R_0^{(90)}$ ),  
651 where  $A_j^{(i)}$  is the  $i^{\text{th}}$  percentile of pixel values in channel  $A$  at time  $j$ . The corresponding  
652 thresholds were  $T_1 = 63$ ,  $T_2 = 27$ , and  $T_3 = -0.4$  (i.e. 40% loss), respectively, where pixel  
653 values were 8-bit (i.e. ranging from 0 to 255). At the first time point, cells with  $B_0^{(96)} \leq T_1$  and  
654  $R_0^{(88)} > T_2$  (i.e. without Sytox Blue staining and with strong TMRM staining) were marked as  
655 alive with polarized mitochondria. All cells not meeting this criterion at the first time point (i.e.  
656 cells that were dead or depolarized at the start of the experiment) were marked as invalid and not  
657 analyzed further. Within the cells that were alive and polarized at the start of the experiment,  
658 those with  $B_t^{(96)} > T_1$  were marked as dead. Within the remaining cells that were alive and  
659 polarized at the start of the experiment and also not dead at time  $t$ , those with  $\bar{R}_t^{(90)} < T_3$  (i.e.  
660 those that had lost more than 40% of their original TMRM signal) were marked as alive with  
661 depolarized mitochondria. These features, the percentile levels, and their thresholds were all  
662 chosen to optimize the classification accuracy, as calculated from the confusion matrix produced

663 by applying the classification to a subset of 546 cells that had been manually classified. Notably,  
664 the relative change in red signal (i.e. TMRM signal) over time was a better classification metric  
665 for loss of mitochondrial polarity than measures of the absolute intensity. This is intuitive, since  
666 even normal chondrocytes may have varying number of mitochondria with varying levels of  
667 polarity. As such, the relative loss of TMRM signal would be a better indicator of within-cell  
668 mitochondrial changes than the absolute intensity at a given time point. This observation  
669 reinforces the importance of following individual cells over time, rather than measuring  
670 population-averaged metrics at each time point.

671 *Density estimates.* The fraction of cells in each state was computed on a 100  $\mu\text{m}$  spatial grid  
672 relative to the impact location. For each sample, Gaussian kernel density estimates were  
673 computed at each grid point, to determine the local number of cells in each state (polarized,  
674 depolarized, dead), as well as the total number of cells. Fractional state occupancy was computed  
675 by dividing by the total cell density, and areas that had less than 30 cells/ $\text{mm}^2$  total were  
676 discarded, in order to ensure adequate counting statistics. To compute average temporal trends,  
677 as shown in Figure 3, cell state data was averaged using cells within 212  $\mu\text{m}$  of the impact  
678 laterally and 1000  $\mu\text{m}$  deep.

679

## 680 **Validation of Experimental Setup and Cellular Function Assay**

681 In order to test the baseline level of cellular dysfunction arising due to systematic and  
682 environmental conditions, a no-impact control experiment was performed. For this variant, one  
683 pair of hemi-cylindrical samples was prepared, imaged, and analyzed as described in *Methods*,  
684 except neither sample was impacted (from N=1 additional animal). In this situation, results  
685 showed negligible cell death and minimal depolarization (Supplemental Fig S3, solid lines). This

686 confirms that the experimental conditions induce minimal cellular dysfunction and thus the main  
687 results of this study are not masked by environmentally-induced changes.

688 In order to validate the three-stain assay used to assess cellular function, two comparison  
689 experiments were performed. For each of these comparisons, a pair of hemi-cylinders was  
690 prepared as described above, except neither sample was impacted (from N=2 additional animals).  
691 Images were collected at 0, 30, and 60 minutes and analyzed as described in *Methods*. In the first  
692 comparison, 4  $\mu$ M FCCP (carbonyl cyanide *p*-trifluoromethoxyphenylhydrazone; Sigma Aldrich,  
693 St. Louis, MO) was added to the impactor's fluid bath immediately after the first imaging time  
694 point. FCCP is an ionophore that causes mitochondrial depolarization by dissipating the proton  
695 gradient (transporting protons) across the inner mitochondrial membrane. For the second  
696 comparison, 2  $\mu$ M oligomycin (Sigma Aldrich) was added immediately after the first imaging  
697 time point. Oligomycin causes hyperpolarization of the inner mitochondrial membrane by  
698 blocking the proton channel subunit of ATP synthase. As expected, after adding FCCP to the  
699 bath, nearly all of the cells were classified as alive with depolarized mitochondria (Supplemental  
700 Fig S3, dotted lines). After oligomycin, nearly all cells remained alive and polarized  
701 (Supplemental Fig S3, dashed lines), following the same trend observed in the no-impact control.  
702 In both cases, there was negligible cell death throughout the experiment, as expected. These  
703 comparisons confirm that the staining assay and analysis procedure used in this study can  
704 appropriately capture changes in mitochondrial polarity over time.

705

## 706 **Transmission Electron Microscopy**

707 Millimeter-sized cubes of cartilage were micro-dissected from approximately 500  $\mu$ m below  
708 the impact location and 1-2 mm away from the hemicylinder's cut surface. These samples were

709 transferred to a petri dish on ice containing 2% Gluteraldehyde in 0.05M cacodylate buffer and  
710 fixed for 2 hours. Samples were then rinsed in cacodylate buffer and placed in 1% Osmium  
711 Tetraoxide for one hour on ice. Samples were rinsed and dehydrated in graded (increasing)  
712 concentrations of Ethanol (25%, 50%, 70%, 95%, 100%), stained in 2% Uranyl Acetate in  
713 ethanol for 2 days, then placed in anhydrous acetone prior to stepwise embedding in 25%, 50%,  
714 75% then 100% epoxy (EMbed 812, Electron Microscopy Sciences, Hatfield, PA). Finally,  
715 samples were sectioned and imaged on an FEI Tecnai 12 BioTwin Transmission Electron  
716 Microscope (ThermoFisher Scientific, Waltham, MA) at 120kV, and 4008×2672 digital images  
717 were captured using a Gatan Orius® 1000 dual-scan CCD camera (Roper Technologies,  
718 Sarasota, FL), using Digital Micrograph (Gatan, Inc., Pleasanton, CA) software.

719

## 720 **Statistical Models**

721 Various linear mixed-effects models were fit to the data to test for significant trends and  
722 difference between testing conditions. In all cases, models were fit and reduced in MATLAB using  
723 fitlme and further statistical contrasts and associated p-values were computed using the method  
724 coefTest. All models included a random effect of source animal on the intercept. Residuals were  
725 checked for normality and homogeneity and response variables were transformed to ensure normal  
726 residuals. Sample treatment condition and impact condition were encoded as binary variables.  
727 Time was also treated as a categorical variable, including time points #2-9, corresponding to 0  
728 through 60 minutes after impact. The time point collected before impact was excluded because all  
729 tracked cells were alive and functional at that time, by definition. The details of each model are  
730 specified below.



731 *Mixed-effects model of mitochondrial dysfunction over time, impact, and treatment*

732 A mixed-effects linear model was fit to test for significant differences in fractional  
733 mitochondrial dysfunction over time, impact condition, and treatment condition, as shown in  
734 Figure 3a. This mixed-effects model is detailed in Supplementary Table 1 and was fit by the  
735 equation:

$$\begin{aligned} 736 \quad & (\text{fraction depolarized})^{\frac{1}{5}} \\ 737 \quad & = 1 + \text{treated} \times \text{impacted} + \text{treated} \times \text{time} + \text{impacted} \times \text{time} \\ 738 \quad & + \text{treated} \times \text{impacted} \times \text{time} + (1|\text{animal}) \end{aligned}$$

739

| Coefficient name          | Coefficient estimate | Standard Error | t Statistic | DOF  | p Value  | 95% CI Lower | 95% CI Upper |
|---------------------------|----------------------|----------------|-------------|------|----------|--------------|--------------|
| (Intercept)               | 0.022                | 0.051          | 0.4         | 4632 | 6.7E-01  | -0.078       | 0.122        |
| 'treated'                 | -0.061               | 0.077          | -0.8        | 4632 | 4.2E-01  | -0.212       | 0.089        |
|                           | 0.635                | 0.023          | 27.9        | 4632 | 4.9E-158 | 0.591        | 0.680        |
| 'impacted'                |                      |                |             |      |          |              |              |
| 'time_3'                  | 0.016                | 0.021          | 0.8         | 4632 | 4.5E-01  | -0.026       | 0.058        |
| 'time_4'                  | 0.023                | 0.021          | 1.1         | 4632 | 2.8E-01  | -0.019       | 0.065        |
| 'time_5'                  | 0.103                | 0.021          | 4.8         | 4632 | 1.5E-06  | 0.061        | 0.144        |
| 'time_6'                  | 0.129                | 0.021          | 6.1         | 4632 | 1.5E-09  | 0.087        | 0.171        |
| 'time_7'                  | 0.141                | 0.021          | 6.6         | 4632 | 3.5E-11  | 0.100        | 0.183        |
| 'time_8'                  | 0.226                | 0.021          | 10.6        | 4632 | 5.8E-26  | 0.184        | 0.267        |
|                           | 0.500                | 0.021          | 23.5        | 4632 | 1.3E-115 | 0.459        | 0.542        |
| 'time_9'                  |                      |                |             |      |          |              |              |
| 'treated:impacted'        | -0.457               | 0.034          | -13.5       | 4632 | 1.1E-40  | -0.524       | -0.391       |
| 'treated:time_3'          | -0.016               | 0.033          | -0.5        | 4632 | 6.2E-01  | -0.080       | 0.048        |
| 'treated:time_4'          | -0.023               | 0.033          | -0.7        | 4632 | 4.8E-01  | -0.087       | 0.041        |
| 'treated:time_5'          | -0.103               | 0.033          | -3.2        | 4632 | 1.6E-03  | -0.166       | -0.039       |
| 'treated:time_6'          | -0.129               | 0.033          | -4.0        | 4632 | 7.6E-05  | -0.193       | -0.065       |
| 'treated:time_7'          | -0.097               | 0.033          | -3.0        | 4632 | 2.8E-03  | -0.161       | -0.034       |
| 'treated:time_8'          | 0.031                | 0.033          | 1.0         | 4632 | 3.4E-01  | -0.033       | 0.095        |
| 'treated:time_9'          | -0.022               | 0.033          | -0.7        | 4632 | 4.9E-01  | -0.086       | 0.042        |
| 'impacted:time_3'         | 0.046                | 0.032          | 1.4         | 4632 | 1.5E-01  | -0.017       | 0.109        |
| 'impacted:time_4'         | 0.055                | 0.032          | 1.7         | 4632 | 8.9E-02  | -0.008       | 0.118        |
| 'impacted:time_5'         | 0.010                | 0.032          | 0.3         | 4632 | 7.6E-01  | -0.053       | 0.073        |
| 'impacted:time_6'         | -0.025               | 0.032          | -0.8        | 4632 | 4.3E-01  | -0.088       | 0.038        |
| 'impacted:time_7'         | -0.034               | 0.032          | -1.1        | 4632 | 2.9E-01  | -0.098       | 0.029        |
| 'impacted:time_8'         | -0.089               | 0.032          | -2.8        | 4632 | 5.6E-03  | -0.152       | -0.026       |
| 'impacted:time_9'         | -0.324               | 0.032          | -10.1       | 4632 | 1.5E-23  | -0.387       | -0.261       |
| 'treated:impacted:time_3' | 0.089                | 0.048          | 1.9         | 4632 | 6.4E-02  | -0.005       | 0.183        |
| 'treated:impacted:time_4' | 0.110                | 0.048          | 2.3         | 4632 | 2.1E-02  | 0.017        | 0.204        |
| 'treated:impacted:time_5' | 0.172                | 0.048          | 3.6         | 4632 | 3.2E-04  | 0.078        | 0.266        |
| 'treated:impacted:time_6' | 0.217                | 0.048          | 4.5         | 4632 | 5.8E-06  | 0.123        | 0.311        |
| 'treated:impacted:time_7' | 0.199                | 0.048          | 4.2         | 4632 | 3.2E-05  | 0.105        | 0.293        |
| 'treated:impacted:time_8' | 0.150                | 0.048          | 3.1         | 4632 | 1.7E-03  | 0.056        | 0.244        |
| 'treated:impacted:time_9' | 0.288                | 0.048          | 6.0         | 4632 | 1.9E-09  | 0.194        | 0.382        |

**Table S1. Mixed-effects model of the fractional depolarization over time, impact condition, and treatment condition.** Each row corresponds to one coefficient in the full model. This model was fit to the data shown in Figure 3a and used compute associated statistical comparisons.

740 *Mixed-effects model of cell death over time, impact, and treatment*

741 A mixed-effects linear model was fit to test for significant differences in fractional cell death  
 742 over time, impact condition, and treatment condition, as shown in Figure 3b. This mixed-effects  
 743 model is detailed in Supplementary Table 2 and was fit by the equation:

744

$$745 \quad (fraction\ dead)_{10}^{\frac{1}{10}}$$

$$746 \quad = 1 + treated \times impacted + treated \times time + impacted \times time + (1|animal)$$

747

| Coefficient name   | Coefficient estimate | Standard Error | t Statistic | DOF  | p Value | 95% CI Lower | 95% CI Upper |
|--------------------|----------------------|----------------|-------------|------|---------|--------------|--------------|
| (Intercept)        | 0.079                | 0.048          | 1.7         | 4639 | 9.9E-02 | -0.015       | 0.173        |
| 'treated'          | -0.098               | 0.071          | -1.4        | 4639 | 1.7E-01 | -0.238       | 0.041        |
| 'impacted'         | 0.095                | 0.020          | 4.9         | 4639 | 1.2E-06 | 0.057        | 0.133        |
| 'time_3'           | -0.008               | 0.021          | -0.4        | 4639 | 7.1E-01 | -0.049       | 0.033        |
| 'time_4'           | 0.001                | 0.021          | 0.0         | 4639 | 9.7E-01 | -0.040       | 0.042        |
| 'time_5'           | 0.059                | 0.021          | 2.8         | 4639 | 5.1E-03 | 0.018        | 0.100        |
| 'time_6'           | 0.067                | 0.021          | 3.2         | 4639 | 1.4E-03 | 0.026        | 0.108        |
| 'time_7'           | 0.067                | 0.021          | 3.2         | 4639 | 1.5E-03 | 0.026        | 0.108        |
| 'time_8'           | 0.078                | 0.021          | 3.7         | 4639 | 1.9E-04 | 0.037        | 0.119        |
| 'time_9'           | 0.067                | 0.021          | 3.2         | 4639 | 1.5E-03 | 0.026        | 0.108        |
| 'treated:impacted' | -0.082               | 0.013          | -6.1        | 4639 | 1.4E-09 | -0.108       | -0.055       |
| 'treated:time_3'   | 0.023                | 0.026          | 0.9         | 4639 | 3.9E-01 | -0.029       | 0.074        |
| 'treated:time_4'   | -0.001               | 0.026          | 0.0         | 4639 | 9.8E-01 | -0.052       | 0.051        |
| 'treated:time_5'   | -0.057               | 0.026          | -2.2        | 4639 | 2.9E-02 | -0.109       | -0.006       |
| 'treated:time_6'   | -0.070               | 0.026          | -2.7        | 4639 | 7.9E-03 | -0.121       | -0.018       |
| 'treated:time_7'   | -0.065               | 0.026          | -2.5        | 4639 | 1.3E-02 | -0.117       | -0.014       |
| 'treated:time_8'   | -0.023               | 0.026          | -0.9        | 4639 | 3.9E-01 | -0.074       | 0.029        |
| 'treated:time_9'   | 0.005                | 0.026          | 0.2         | 4639 | 8.5E-01 | -0.047       | 0.056        |
| 'impacted:time_3'  | 0.121                | 0.026          | 4.6         | 4639 | 4.4E-06 | 0.069        | 0.172        |
| 'impacted:time_4'  | 0.225                | 0.026          | 8.6         | 4639 | 1.2E-17 | 0.174        | 0.277        |
| 'impacted:time_5'  | 0.238                | 0.026          | 9.1         | 4639 | 1.5E-19 | 0.187        | 0.290        |
| 'impacted:time_6'  | 0.288                | 0.026          | 11.0        | 4639 | 1.0E-27 | 0.237        | 0.339        |
| 'impacted:time_7'  | 0.295                | 0.026          | 11.2        | 4639 | 6.6E-29 | 0.243        | 0.346        |
| 'impacted:time_8'  | 0.325                | 0.026          | 12.4        | 4639 | 1.0E-34 | 0.274        | 0.376        |
| 'impacted:time_9'  | 0.334                | 0.026          | 12.7        | 4639 | 1.6E-36 | 0.283        | 0.385        |

**Table S2. Mixed-effects model of the fractional cell death over time, impact condition, and treatment condition.** Each row corresponds to one coefficient in the full model. This model was fit to the data shown in Figure 3b and used compute associated statistical comparisons.

748 *Mixed-effects model of mitochondrial dysfunction over time, impact strain norm, and treatment*

749 A mixed-effects linear model was fit to test for significant differences in fractional  
 750 mitochondrial dysfunction over time, impact strain norm, and treatment condition, as shown in  
 751 Figure 4. This model was fit using data from impacted samples only, because no-impact samples  
 752 have zero strain, by definition, and thus the two variables are not independent. This mixed-effects  
 753 model is detailed in Supplementary Table 3 and was fit by the equation:

754 
$$(fraction\ depolarized)^{\frac{1}{2}} = 1 + time + treated \times strain + (1|animal)$$

755

| Coefficient name | Coefficient estimate | Standard Error | t Statistic | DOF  | p Value  | 95% CI |        |
|------------------|----------------------|----------------|-------------|------|----------|--------|--------|
|                  |                      |                |             |      |          | Lower  | Upper  |
| (Intercept)      | 0.036                | 0.048          | 0.7         | 5709 | 4.6E-01  | -0.059 | 0.130  |
| 'treated'        | -0.002               | 0.071          | 0.0         | 5709 | 9.8E-01  | -0.142 | 0.138  |
| 'strain'         | 2.440                | 0.061          | 39.9        | 5709 | 8.0E-308 | 2.321  | 2.560  |
| 'time_3'         | 0.056                | 0.012          | 4.8         | 5709 | 1.3E-06  | 0.033  | 0.078  |
| 'time_4'         | 0.071                | 0.012          | 6.1         | 5709 | 9.1E-10  | 0.048  | 0.093  |
| 'time_5'         | 0.094                | 0.012          | 8.1         | 5709 | 4.5E-16  | 0.071  | 0.116  |
| 'time_6'         | 0.100                | 0.012          | 8.7         | 5709 | 5.1E-18  | 0.077  | 0.123  |
| 'time_7'         | 0.113                | 0.012          | 9.8         | 5709 | 1.9E-22  | 0.090  | 0.135  |
| 'time_8'         | 0.195                | 0.012          | 17.0        | 5709 | 5.4E-63  | 0.173  | 0.218  |
| 'time_9'         | 0.316                | 0.012          | 27.5        | 5709 | 6.3E-156 | 0.294  | 0.339  |
| 'treated:strain' | -2.371               | 0.090          | -26.2       | 5709 | 2.8E-143 | -2.548 | -2.194 |

**Table S3. Mixed-effects model of the fractional mitochondrial dysfunction over time, impact strain norm, and treatment condition.** Each row corresponds to one coefficient in the full model. This model was fit to the data shown in Figure 3 and Figure 4 and used compute associated statistical comparisons.
